# Supplementary material for: Metabonomics study on nephrotoxicity induced by intraperitoneal and intravenous cisplatin administration using rapid resolution liquid chromatography coupled with quadrupole-time-of-flight mass spectrometry (RRLC-Q-TOF-MS)
Source: Royal Society of Chemistry journal article supplement (doi:10.1039/c3ra46920d), 2014-01-01
Supplement: c3ra46920d.pdf [file c3ra46920d.pdf]

**Fig. S1** Typical total ion current (TIC) chromatograms of plasma in different groups.

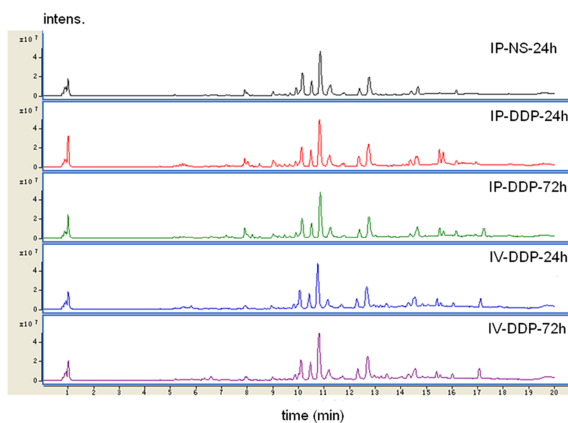

**Fig. S2** The result of multivariate statistical analysis. (A) PLS-DA score plot of IV-DDP-24h and IV-DDP-72h. (B) PLS-DA score plot of IP-DDP-72h and IV-DDP-72h.

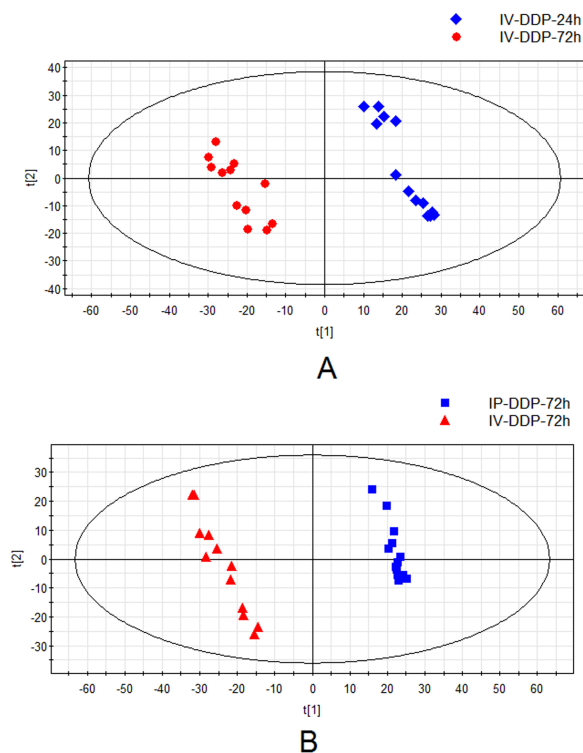

**Table S1.**  $R^2$  and  $Q^2$  value of established PLS-DA models.

|        | IP-NS-24h vs<br>IP-DDP-24h | IP-NS-72h vs<br>IP-DDP-72h | IV-NS-24h vs<br>IV-DDP-24h | IV-NS-72h vs<br>IV-DDP-72h |
|--------|----------------------------|----------------------------|----------------------------|----------------------------|
| $R^2Y$ | 0.999                      | 0.999                      | 0.999                      | 0.999                      |
| $R^2X$ | 0.458                      | 0.338                      | 0.354                      | 0.401                      |
| $Q^2$  | 0.982                      | 0.966                      | 0.871                      | 0.95                       |

Note:

$R^2$  and  $Q^2$  parameters indicate the fitness and prediction of the model.
